# Supplementary material for: An Investigation on Attributes of Ambient Temperature and Diurnal Temperature Range on Mortality in Five East-Asian Countries
Source: PubMed Central journal article supplement (PMC5579298; doi:10.1038/s41598-017-10433-8), 2017-08-31

**Supplementary Information.**

**Title:** An Investigation on Attributes of Ambient Temperature and Diurnal Temperature Range on Mortality in Five East-Asian Countries

**Author Affiliation:**

Whan-Hee Lee<sup>1</sup>, Youn-Hee Lim<sup>2,3</sup>, Tran Ngoc Dang<sup>4</sup>, Xerxes Seposo<sup>4</sup>, Yasushi Honda<sup>4</sup>, Yue-Liang Leon Guo<sup>5</sup>, Hye-Min Jang<sup>6</sup>, and Ho Kim<sup>1</sup>

<sup>1</sup>Graduated School of Public Health, Seoul National University, Seoul, Republic of Korea. <sup>2</sup>Institute of Environmental Medicine, Seoul National University of Medical Research Center, Seoul National University, Republic of Korea. <sup>3</sup>Environmental Health Center, Seoul National University College of Medicine, Republic of Korea. <sup>4</sup>Faculty of Health and Sports Sciences, University of Tsukuba, Tsukuba, Japan. <sup>5</sup>Department of Environmental and Occupational Medicine, National Taiwan University, Taipei, Taiwan. <sup>6</sup>Department of Statistics, Ewha Womans' University, Seoul, Republic of Korea.

**Corresponding Author:** Ho Kim, Graduated School of Public Health, Seoul National University, 1 Gwanak-ro, Gwanak-gu, Seoul 151-742, Republic of Korea. Telephone: (82) 2 880-2702 E-mail:hokim@snu.ac.kr

**Supplementary Table S1.** Estimated on the fraction (%) attributable to ambient temperature and diurnal temperature range (DTR) by various model choices as a sensitivity analysis.

| <b>Total death</b>                                                                                             | Temperature (%) | Extreme Cold (%) | Extreme Heat (%) | Diurnal Temperature Range (%) |
|----------------------------------------------------------------------------------------------------------------|-----------------|------------------|------------------|-------------------------------|
| Main Model                                                                                                     | 9.36            | 0.80             | 0.16             | 0.59                          |
| Knots for temperature-mortality: 10 <sup>th</sup> , 50 <sup>th</sup> , and 90 <sup>th</sup>                    | 8.92            | 0.78             | 0.14             | 0.59                          |
| Knots for temperature-mortality: 10 <sup>th</sup> , 25 <sup>th</sup> , 75 <sup>th</sup> , and 90 <sup>th</sup> | 9.09            | 0.78             | 0.16             | 0.63                          |
| Cubic B-spline for temperature-mortality                                                                       | 9.36            | 0.80             | 0.16             | 0.59                          |
| Df for temperature lag response: 6                                                                             | 9.15            | 0.79             | 0.16             | 0.58                          |
| Df for DTR lag response: 5                                                                                     | 9.36            | 0.80             | 0.16             | 0.58                          |
| Temperature lag periods: 14 days                                                                               | 10.53           | 0.77             | 0.24             | 0.59                          |
| Temperature lag periods: 21 days                                                                               | 10.10           | 0.82             | 0.20             | 0.54                          |
| DTR lag: 7 days                                                                                                | 9.36            | 0.80             | 0.16             | 0.97                          |
| Df/year for seasonal control: 6                                                                                | 7.25            | 0.76             | 0.23             | 0.77                          |
| Df/year for seasonal control: 7                                                                                | 9.38            | 0.81             | 0.16             | 0.67                          |
| Df/year for seasonal control: 10                                                                               | 6.52            | 0.63             | 0.18             | 0.52                          |
| Only three countries (Japan, Korea and Chinese Taiwan) with periods 2004 to 2007                               | 8.30            | 0.71             | 0.15             | 0.47                          |
| Add influenza epidemic (10 cities of Korea and Chinese Taiwan)                                                 | 8.66            | 0.56             | 0.20             | 0.85                          |
| Add humidity (Japan, Korea, and Chinese Taiwan)                                                                | 10.24           | 0.83             | 0.21             | 0.86                          |

  

| <b>Cardiovascular-related death</b>                                                                            | Temperature (%) | Extreme Cold (%) | Extreme Heat (%) | Diurnal Temperature Range (%) |
|----------------------------------------------------------------------------------------------------------------|-----------------|------------------|------------------|-------------------------------|
| Main Model                                                                                                     | 15.36           | 1.13             | 0.26             | 0.75                          |
| Knots for temperature-mortality: 10 <sup>th</sup> , 50 <sup>th</sup> , and 90 <sup>th</sup>                    | 14.99           | 1.00             | 0.28             | 0.77                          |
| Knots for temperature-mortality: 10 <sup>th</sup> , 25 <sup>th</sup> , 75 <sup>th</sup> , and 90 <sup>th</sup> | 14.93           | 1.02             | 0.25             | 0.71                          |
| Cubic B-spline for temperature-mortality                                                                       | 16.21           | 1.07             | 0.30             | 0.74                          |
| Df for temperature lag response: 6                                                                             | 16.08           | 1.06             | 0.30             | 0.73                          |
| Df for DTR lag response: 5                                                                                     | 16.21           | 1.07             | 0.30             | 0.74                          |
| Temperature lag periods: 14 days                                                                               | 17.49           | 1.12             | 0.40             | 0.74                          |
| Temperature lag periods: 21 days                                                                               | 17.16           | 1.13             | 0.34             | 0.71                          |
| DTR lag: 7 days                                                                                                | 16.21           | 1.07             | 0.30             | 1.08                          |
| Df/year for seasonal control: 6                                                                                | 12.09           | 0.96             | 0.29             | 1.22                          |
| Df/year for seasonal control: 7                                                                                | 16.39           | 1.29             | 0.23             | 0.84                          |
| Df/year for seasonal control: 10                                                                               | 11.42           | 0.91             | 0.27             | 0.99                          |
| Minimum mortality temperature of non-accidental mortality                                                      | 17.28           | 1.32             | 0.27             | 0.78                          |
| Only three countries (Japan, Korea and Chinese Taiwan) with periods 2004 to 2007                               | 13.89           | 1.03             | 2.63             | 0.85                          |
| Add influenza epidemic (10 cities of Korea and Chinese Taiwan)                                                 | 11.16           | 0.84             | 0.16             | 0.96                          |
| Add humidity (Japan, Korea, and Chinese Taiwan)                                                                | 17.32           | 1.32             | 0.27             | 0.78                          |

  

| <b>Respiratory-related death</b>                                                                               | Temperature (%) | Extreme Cold (%) | Extreme Heat (%) | Diurnal Temperature Range (%) |
|----------------------------------------------------------------------------------------------------------------|-----------------|------------------|------------------|-------------------------------|
| Main Model                                                                                                     | 8.63            | 0.89             | 0.26             | 0.42                          |
| Knots for temperature-mortality: 10 <sup>th</sup> , 50 <sup>th</sup> , and 90 <sup>th</sup>                    | 7.58            | 0.87             | 0.28             | 0.42                          |
| Knots for temperature-mortality: 10 <sup>th</sup> , 25 <sup>th</sup> , 75 <sup>th</sup> , and 90 <sup>th</sup> | Not converged   | Not converged    | Not converged    | Not converged                 |
| Cubic B-spline for temperature-mortality                                                                       | 8.60            | 0.88             | 0.26             | 0.43                          |
| Df for temperature lag response: 6                                                                             | 8.60            | 0.88             | 0.26             | 0.43                          |
| Df for DTR lag response: 5                                                                                     | 8.60            | 0.88             | 0.26             | 0.42                          |

|                                                                                     |       |      |      |      |
|-------------------------------------------------------------------------------------|-------|------|------|------|
| Temperature lag periods: 14 days                                                    | 9.55  | 0.90 | 0.30 | 0.52 |
| Temperature lag periods: 21 days                                                    | 8.92  | 0.89 | 0.28 | 0.43 |
| DTR lag: 7 days                                                                     | 8.60  | 0.88 | 0.26 | 0.49 |
| Df/year for seasonal control: 6                                                     | 9.53  | 0.89 | 0.29 | 0.71 |
| Df/year for seasonal control: 7                                                     | 7.04  | 0.86 | 0.22 | 0.48 |
| Df/year for seasonal control: 10                                                    | 8.50  | 0.88 | 0.26 | 0.44 |
| Minimum mortality temperature<br>of non-accidental mortality                        | 8.18  | 0.81 | 0.30 | 0.39 |
| Only three countries (Japan, Korea and Chinese<br>Taiwan) with periods 2004 to 2007 | 6.15  | 0.55 | 0.20 | 0.60 |
| Add influenza epidemic<br>(10 cities of Korea and Chinese Taiwan)                   | 15.20 | 0.62 | 0.73 | 0.48 |
| Add humidity<br>(Japan, Korea, and Chinese Taiwan)                                  | 8.50  | 0.84 | 0.33 | 0.54 |

---

**Supplementary Table S2.** Attributable (non-accidental) mortality fractions (AF, %) by city, with 95% empirical confidence intervals.

| Attributable Fractions for Total Mortality (%) |           |                          |      |       |                           |      |      |                          |       |      |                                        |       |      |
|------------------------------------------------|-----------|--------------------------|------|-------|---------------------------|------|------|--------------------------|-------|------|----------------------------------------|-------|------|
| Country /Region                                | City      | Temperature AF (95% eCI) |      |       | Extreme Cold AF (95% eCI) |      |      | Extreme Hot AF (95% eCI) |       |      | Diurnal Temperature Range AF (95% eCI) |       |      |
| Japan                                          | Aichi     | 10.47                    | 8.67 | 12.13 | 0.88                      | 0.75 | 1.00 | 0.24                     | 0.15  | 0.32 | 0.63                                   | 0.40  | 0.86 |
|                                                | Akita     | 11.61                    | 9.32 | 13.76 | 0.79                      | 0.54 | 1.03 | 0.26                     | 0.16  | 0.36 | 0.47                                   | 0.20  | 0.76 |
|                                                | Aomori    | 12.60                    | 9.82 | 15.27 | 0.73                      | 0.47 | 0.95 | 0.37                     | 0.25  | 0.49 | 0.47                                   | 0.09  | 0.86 |
|                                                | Chiba     | 9.48                     | 7.83 | 11.12 | 0.76                      | 0.61 | 0.92 | 0.11                     | 0.03  | 0.19 | 0.58                                   | 0.33  | 0.81 |
|                                                | Ehime     | 8.65                     | 6.59 | 10.48 | 0.93                      | 0.76 | 1.08 | 0.11                     | 0.00  | 0.20 | 0.60                                   | 0.36  | 0.83 |
|                                                | Fukushima | 11.65                    | 9.51 | 13.68 | 0.90                      | 0.67 | 1.11 | 0.29                     | 0.17  | 0.40 | 0.65                                   | 0.37  | 0.95 |
|                                                | Fukui     | 10.52                    | 8.48 | 12.64 | 0.96                      | 0.71 | 1.18 | 0.21                     | 0.09  | 0.32 | 0.62                                   | 0.42  | 0.82 |
|                                                | Fukuoka   | 7.48                     | 5.38 | 9.56  | 0.84                      | 0.70 | 0.96 | 0.10                     | -0.01 | 0.20 | 0.52                                   | 0.24  | 0.75 |
|                                                | Gifu      | 9.42                     | 7.39 | 11.41 | 0.96                      | 0.77 | 1.13 | 0.16                     | 0.05  | 0.26 | 0.64                                   | 0.39  | 0.89 |
|                                                | Gunma     | 9.62                     | 7.81 | 11.33 | 0.82                      | 0.64 | 1.00 | 0.17                     | 0.05  | 0.27 | 0.67                                   | 0.46  | 0.89 |
|                                                | Hokkaido  | 8.55                     | 5.30 | 11.58 | 0.43                      | 0.19 | 0.62 | 0.18                     | 0.07  | 0.28 | 0.33                                   | -0.20 | 0.88 |
|                                                | Hiroshima | 8.37                     | 5.63 | 10.89 | 0.82                      | 0.66 | 0.98 | 0.17                     | 0.03  | 0.28 | 0.50                                   | 0.08  | 0.95 |
|                                                | Hyogo     | 6.81                     | 4.82 | 8.54  | 0.82                      | 0.69 | 0.94 | 0.03                     | -0.06 | 0.13 | 0.47                                   | 0.24  | 0.72 |
|                                                | Ibaraki   | 11.16                    | 9.11 | 13.23 | 0.93                      | 0.72 | 1.11 | 0.15                     | 0.05  | 0.24 | 0.74                                   | 0.40  | 1.11 |
|                                                | Ishikawa  | 10.16                    | 8.42 | 11.88 | 0.82                      | 0.60 | 1.02 | 0.22                     | 0.11  | 0.32 | 0.53                                   | 0.36  | 0.72 |
|                                                | Iwate     | 12.21                    | 9.26 | 15.24 | 0.65                      | 0.35 | 0.93 | 0.30                     | 0.18  | 0.42 | 0.59                                   | 0.07  | 1.12 |
|                                                | Kagawa    | 8.93                     | 6.71 | 11.19 | 0.90                      | 0.73 | 1.07 | 0.14                     | 0.00  | 0.27 | 0.61                                   | 0.36  | 0.84 |
|                                                | Kanagawa  | 9.21                     | 7.08 | 11.42 | 0.61                      | 0.43 | 0.78 | 0.13                     | 0.02  | 0.24 | 0.62                                   | 0.24  | 0.97 |
|                                                | Kagoshima | 8.80                     | 6.70 | 10.72 | 1.26                      | 1.09 | 1.40 | 0.15                     | 0.02  | 0.27 | 0.64                                   | 0.28  | 0.98 |
|                                                | Kochi     | 8.00                     | 5.93 | 9.86  | 1.13                      | 0.93 | 1.31 | 0.03                     | -0.05 | 0.12 | 0.71                                   | 0.41  | 1.01 |
|                                                | Kumamoto  | 8.38                     | 6.49 | 10.22 | 1.12                      | 0.96 | 1.27 | 0.06                     | -0.06 | 0.17 | 0.72                                   | 0.41  | 1.03 |
|                                                | Kyoto     | 9.01                     | 6.85 | 10.92 | 0.83                      | 0.66 | 0.98 | 0.14                     | 0.05  | 0.24 | 0.63                                   | 0.37  | 0.89 |
|                                                | Mie       | 9.39                     | 7.20 | 11.52 | 1.04                      | 0.85 | 1.19 | 0.10                     | -0.01 | 0.20 | 0.53                                   | 0.33  | 0.74 |
|                                                | Miyagi    | 10.85                    | 8.57 | 13.07 | 0.86                      | 0.64 | 1.05 | 0.13                     | 0.04  | 0.23 | 0.57                                   | 0.25  | 0.87 |
|                                                | Miyazaki  | 9.29                     | 7.38 | 11.34 | 1.21                      | 1.04 | 1.38 | 0.11                     | 0.01  | 0.21 | 0.72                                   | 0.37  | 1.05 |
|                                                | Nagano    | 11.65                    | 9.38 | 13.85 | 0.87                      | 0.64 | 1.06 | 0.22                     | 0.13  | 0.31 | 0.64                                   | 0.29  | 0.98 |
|                                                | Nagasaki  | 7.87                     | 5.71 | 10.18 | 0.98                      | 0.80 | 1.14 | 0.08                     | -0.02 | 0.18 | 0.52                                   | 0.29  | 0.76 |
|                                                | Nara      | 10.20                    | 8.23 | 11.91 | 0.87                      | 0.68 | 1.05 | 0.12                     | 0.03  | 0.20 | 0.72                                   | 0.49  | 0.96 |
|                                                | Niigata   | 11.31                    | 9.64 | 12.95 | 0.82                      | 0.66 | 0.97 | 0.26                     | 0.17  | 0.34 | 0.47                                   | 0.31  | 0.65 |
|                                                | Oita      | 8.27                     | 6.21 | 10.18 | 0.97                      | 0.80 | 1.13 | 0.08                     | -0.02 | 0.17 | 0.64                                   | 0.40  | 0.89 |
|                                                | Okayama   | 8.22                     | 5.97 | 10.43 | 0.97                      | 0.80 | 1.14 | 0.12                     | 0.00  | 0.24 | 0.59                                   | 0.25  | 0.95 |
|                                                | Okinawa   | 7.95                     | 2.43 | 13.27 | 1.10                      | 0.79 | 1.36 | 0.00                     | -0.01 | 0.01 | 0.53                                   | 0.00  | 1.06 |
|                                                | Osaka     | 8.97                     | 7.11 | 10.67 | 0.81                      | 0.67 | 0.93 | 0.14                     | 0.06  | 0.22 | 0.55                                   | 0.28  | 0.77 |
|                                                | Saga      | 8.70                     | 6.15 | 11.12 | 1.05                      | 0.86 | 1.23 | 0.11                     | 0.00  | 0.23 | 0.64                                   | 0.34  | 0.96 |
|                                                | Saitama   | 10.39                    | 8.67 | 11.91 | 0.81                      | 0.68 | 0.94 | 0.20                     | 0.12  | 0.28 | 0.69                                   | 0.45  | 0.91 |

|                 |             |       |      |       |      |       |      |      |       |      |       |       |      |
|-----------------|-------------|-------|------|-------|------|-------|------|------|-------|------|-------|-------|------|
|                 | Shiga       | 11.09 | 9.07 | 13.12 | 0.98 | 0.76  | 1.18 | 0.16 | 0.04  | 0.27 | 0.56  | 0.35  | 0.81 |
|                 | Shimane     | 8.72  | 6.42 | 10.83 | 0.90 | 0.69  | 1.10 | 0.13 | 0.03  | 0.23 | 0.53  | 0.29  | 0.77 |
|                 | Shizuoka    | 9.67  | 7.78 | 11.46 | 0.88 | 0.71  | 1.04 | 0.12 | 0.04  | 0.20 | 0.71  | 0.39  | 1.03 |
|                 | Tokushima   | 7.72  | 5.03 | 10.10 | 0.89 | 0.71  | 1.06 | 0.08 | -0.03 | 0.19 | 0.50  | 0.22  | 0.77 |
|                 | Tochigi     | 11.31 | 9.15 | 13.36 | 0.93 | 0.75  | 1.11 | 0.19 | 0.09  | 0.29 | 0.75  | 0.44  | 1.04 |
|                 | Tokyo       | 8.72  | 7.13 | 10.32 | 0.57 | 0.43  | 0.71 | 0.14 | 0.07  | 0.22 | 0.54  | 0.33  | 0.75 |
|                 | Tottori     | 9.13  | 6.91 | 11.30 | 0.95 | 0.75  | 1.14 | 0.17 | 0.05  | 0.29 | 0.58  | 0.28  | 0.89 |
|                 | Toyama      | 8.88  | 6.60 | 11.09 | 0.65 | 0.42  | 0.88 | 0.16 | 0.06  | 0.26 | 0.51  | 0.26  | 0.76 |
|                 | Wakayama    | 8.69  | 6.44 | 11.05 | 0.90 | 0.71  | 1.09 | 0.09 | -0.01 | 0.19 | 0.58  | 0.34  | 0.80 |
|                 | Yamagata    | 10.83 | 8.40 | 13.15 | 0.62 | 0.34  | 0.87 | 0.26 | 0.15  | 0.36 | 0.58  | 0.26  | 0.92 |
|                 | Yamaguchi   | 9.07  | 7.06 | 10.96 | 0.90 | 0.75  | 1.04 | 0.17 | 0.06  | 0.28 | 0.68  | 0.39  | 0.95 |
|                 | Yamanashi   | 10.18 | 8.11 | 12.08 | 0.92 | 0.69  | 1.12 | 0.14 | 0.03  | 0.23 | 0.78  | 0.52  | 1.02 |
| Korea           | Busan       | 11.03 | 5.77 | 15.94 | 0.50 | 0.08  | 0.86 | 0.08 | -0.13 | 0.27 | 0.89  | -0.04 | 1.85 |
|                 | Daegu       | 9.90  | 5.27 | 14.19 | 0.31 | -0.13 | 0.69 | 0.12 | -0.06 | 0.29 | 1.05  | -0.02 | 2.02 |
|                 | Daejeon     | 11.02 | 6.81 | 15.04 | 0.53 | 0.13  | 0.88 | 0.17 | 0.02  | 0.31 | 0.97  | 0.01  | 1.93 |
|                 | Gwangju     | 11.25 | 6.21 | 15.94 | 0.38 | -0.05 | 0.74 | 0.16 | -0.01 | 0.33 | 1.04  | 0.01  | 2.07 |
|                 | Incheon     | 9.75  | 5.11 | 14.00 | 0.62 | 0.29  | 0.93 | 0.09 | -0.04 | 0.22 | 0.68  | -0.10 | 1.45 |
|                 | Seoul       | 9.90  | 5.04 | 14.03 | 0.45 | 0.13  | 0.76 | 0.17 | 0.02  | 0.30 | 0.65  | -0.34 | 1.58 |
|                 | Ulsan       | 12.06 | 6.51 | 17.48 | 0.55 | 0.07  | 0.93 | 0.20 | -0.05 | 0.42 | 1.05  | 0.01  | 2.14 |
| Chinese Taiwan  | Kaohsiung   | 6.21  | 3.99 | 8.30  | 0.97 | 0.59  | 1.25 | 0.31 | 0.11  | 0.48 | 0.51  | -0.54 | 1.54 |
|                 | Taipei      | 7.55  | 4.98 | 9.67  | 1.02 | 0.64  | 1.33 | 0.26 | 0.09  | 0.42 | 0.46  | -0.59 | 1.49 |
|                 | Taichung    | 6.25  | 4.06 | 8.30  | 0.95 | 0.55  | 1.28 | 0.24 | 0.07  | 0.39 | 0.58  | -0.74 | 1.81 |
| Vietnam         | Ho Chi Minh | 11.42 | 2.74 | 19.35 | 0.09 | -0.44 | 0.48 | 0.91 | 0.41  | 1.30 | -0.99 | -6.02 | 3.81 |
|                 | Hue         | 10.58 | 1.94 | 16.84 | 0.80 | -1.10 | 1.77 | 0.79 | 0.31  | 1.18 | -1.59 | -8.32 | 4.51 |
| The Philippines | Cebu        | 6.07  | 0.68 | 10.71 | 0.43 | -0.02 | 0.80 | 0.63 | 0.37  | 0.86 | 1.08  | -1.05 | 3.13 |
|                 | Davao       | 6.74  | 1.05 | 12.09 | 0.26 | -0.20 | 0.60 | 0.81 | 0.44  | 1.08 | 1.08  | -0.97 | 2.94 |
|                 | Manila      | 6.27  | 0.51 | 11.57 | 0.19 | -0.60 | 0.71 | 0.70 | 0.39  | 0.96 | 1.41  | -0.96 | 3.98 |
|                 | Quezon      | 6.53  | 1.24 | 11.43 | 0.41 | -0.37 | 0.90 | 0.65 | 0.37  | 0.88 | 1.52  | -1.28 | 4.08 |

**Supplementary Table S3.** Attributable (cardiovascular-related) mortality fractions (AF, %) by city, with 95% empirical confidence intervals.

| Attributable Fractions for Cardiovascular Mortality (%) |           |                          |       |       |                           |      |      |                          |       |      |                                        |       |      |
|---------------------------------------------------------|-----------|--------------------------|-------|-------|---------------------------|------|------|--------------------------|-------|------|----------------------------------------|-------|------|
| Country /Region                                         | City      | Temperature AF (95% eCI) |       |       | Extreme Cold AF (95% eCI) |      |      | Extreme Hot AF (95% eCI) |       |      | Diurnal Temperature Range AF (95% eCI) |       |      |
| Japan                                                   | Aichi     | 16.22                    | 14.11 | 18.39 | 1.18                      | 1.01 | 1.34 | 0.41                     | 0.27  | 0.53 | 0.79                                   | 0.43  | 1.15 |
|                                                         | Akita     | 17.65                    | 13.92 | 20.80 | 1.13                      | 0.78 | 1.41 | 0.37                     | 0.21  | 0.52 | 0.62                                   | 0.19  | 1.07 |
|                                                         | Aomori    | 18.27                    | 14.33 | 22.50 | 1.01                      | 0.64 | 1.29 | 0.50                     | 0.31  | 0.68 | 0.63                                   | 0.04  | 1.20 |
|                                                         | Chiba     | 16.18                    | 13.40 | 18.63 | 1.07                      | 0.87 | 1.26 | 0.22                     | 0.07  | 0.35 | 0.72                                   | 0.31  | 1.13 |
|                                                         | Ehime     | 15.60                    | 12.50 | 18.43 | 1.25                      | 1.03 | 1.47 | 0.21                     | 0.05  | 0.36 | 0.74                                   | 0.32  | 1.13 |
|                                                         | Fukushima | 18.87                    | 15.75 | 21.87 | 1.34                      | 1.10 | 1.56 | 0.34                     | 0.17  | 0.50 | 0.84                                   | 0.36  | 1.33 |
|                                                         | Fukui     | 18.50                    | 15.17 | 21.49 | 1.44                      | 1.16 | 1.68 | 0.30                     | 0.12  | 0.46 | 0.78                                   | 0.46  | 1.13 |
|                                                         | Fukuoka   | 13.98                    | 11.23 | 16.61 | 1.15                      | 0.96 | 1.32 | 0.22                     | 0.06  | 0.39 | 0.64                                   | 0.19  | 1.11 |
|                                                         | Gifu      | 15.91                    | 13.30 | 18.19 | 1.27                      | 1.07 | 1.48 | 0.33                     | 0.15  | 0.47 | 0.80                                   | 0.41  | 1.24 |
|                                                         | Gunma     | 16.59                    | 13.86 | 19.58 | 1.18                      | 0.94 | 1.40 | 0.30                     | 0.14  | 0.46 | 0.85                                   | 0.48  | 1.17 |
|                                                         | Hokkaido  | 13.17                    | 8.61  | 17.46 | 0.61                      | 0.28 | 0.87 | 0.35                     | 0.19  | 0.49 | 0.47                                   | -0.40 | 1.32 |
|                                                         | Hiroshima | 14.64                    | 11.05 | 17.91 | 1.19                      | 0.96 | 1.40 | 0.27                     | 0.08  | 0.45 | 0.63                                   | -0.13 | 1.40 |
|                                                         | Hyogo     | 14.35                    | 11.19 | 17.23 | 1.21                      | 1.03 | 1.38 | 0.12                     | -0.03 | 0.27 | 0.58                                   | 0.18  | 0.97 |
|                                                         | Ibaraki   | 18.24                    | 15.06 | 21.50 | 1.25                      | 1.00 | 1.46 | 0.22                     | 0.07  | 0.36 | 0.93                                   | 0.30  | 1.56 |
|                                                         | Ishikawa  | 16.76                    | 13.59 | 19.45 | 1.21                      | 0.94 | 1.44 | 0.33                     | 0.16  | 0.48 | 0.68                                   | 0.39  | 0.95 |
|                                                         | Iwate     | 17.74                    | 13.22 | 21.98 | 0.96                      | 0.55 | 1.28 | 0.42                     | 0.23  | 0.59 | 0.79                                   | -0.07 | 1.57 |
|                                                         | Kagawa    | 16.16                    | 12.98 | 19.14 | 1.22                      | 0.96 | 1.43 | 0.29                     | 0.07  | 0.46 | 0.76                                   | 0.32  | 1.19 |
|                                                         | Kanagawa  | 15.13                    | 11.55 | 18.81 | 0.85                      | 0.58 | 1.09 | 0.32                     | 0.15  | 0.49 | 0.77                                   | 0.16  | 1.41 |
|                                                         | Kagoshima | 15.51                    | 12.68 | 18.10 | 1.57                      | 1.34 | 1.75 | 0.22                     | -0.03 | 0.42 | 0.78                                   | 0.16  | 1.34 |
|                                                         | Kochi     | 15.70                    | 12.59 | 18.44 | 1.50                      | 1.26 | 1.71 | 0.11                     | -0.02 | 0.23 | 0.87                                   | 0.34  | 1.37 |
|                                                         | Kumamoto  | 15.50                    | 12.68 | 18.18 | 1.45                      | 1.22 | 1.64 | 0.16                     | -0.04 | 0.35 | 0.89                                   | 0.36  | 1.38 |
|                                                         | Kyoto     | 15.95                    | 12.86 | 18.60 | 1.21                      | 0.99 | 1.40 | 0.24                     | 0.09  | 0.37 | 0.78                                   | 0.37  | 1.22 |
|                                                         | Mie       | 17.32                    | 14.68 | 19.76 | 1.42                      | 1.20 | 1.59 | 0.21                     | 0.07  | 0.36 | 0.66                                   | 0.30  | 1.00 |
|                                                         | Miyagi    | 18.66                    | 15.21 | 21.79 | 1.24                      | 0.95 | 1.47 | 0.22                     | 0.07  | 0.36 | 0.73                                   | 0.19  | 1.24 |
|                                                         | Miyazaki  | 16.00                    | 12.85 | 18.85 | 1.49                      | 1.23 | 1.70 | 0.17                     | 0.01  | 0.32 | 0.88                                   | 0.30  | 1.41 |
|                                                         | Nagano    | 17.10                    | 13.35 | 20.64 | 1.10                      | 0.82 | 1.36 | 0.33                     | 0.19  | 0.47 | 0.84                                   | 0.28  | 1.39 |
|                                                         | Nagasaki  | 13.97                    | 11.07 | 16.65 | 1.33                      | 1.11 | 1.54 | 0.11                     | -0.04 | 0.26 | 0.64                                   | 0.23  | 1.04 |
|                                                         | Nara      | 17.90                    | 14.95 | 20.79 | 1.22                      | 0.99 | 1.42 | 0.19                     | 0.05  | 0.34 | 0.91                                   | 0.50  | 1.33 |
|                                                         | Niigata   | 17.78                    | 15.19 | 20.25 | 1.17                      | 0.95 | 1.38 | 0.40                     | 0.26  | 0.52 | 0.60                                   | 0.33  | 0.88 |
|                                                         | Oita      | 15.59                    | 12.50 | 18.49 | 1.30                      | 1.06 | 1.51 | 0.15                     | 0.00  | 0.31 | 0.79                                   | 0.38  | 1.21 |
|                                                         | Okayama   | 15.55                    | 12.15 | 18.73 | 1.34                      | 1.13 | 1.54 | 0.19                     | -0.03 | 0.36 | 0.74                                   | 0.20  | 1.30 |
|                                                         | Okinawa   | 13.97                    | 7.82  | 19.29 | 1.34                      | 0.92 | 1.65 | 0.07                     | -0.33 | 0.39 | 0.62                                   | -0.30 | 1.52 |
|                                                         | Osaka     | 14.42                    | 12.29 | 16.80 | 1.10                      | 0.94 | 1.27 | 0.24                     | 0.10  | 0.38 | 0.68                                   | 0.27  | 1.08 |
|                                                         | Saga      | 15.98                    | 12.66 | 19.04 | 1.48                      | 1.23 | 1.70 | 0.16                     | -0.01 | 0.32 | 0.80                                   | 0.26  | 1.33 |
|                                                         | Saitama   | 16.97                    | 14.57 | 19.34 | 1.11                      | 0.92 | 1.27 | 0.34                     | 0.21  | 0.45 | 0.87                                   | 0.45  | 1.26 |

|                 |             |       |        |       |       |       |      |      |       |      |       |       |      |
|-----------------|-------------|-------|--------|-------|-------|-------|------|------|-------|------|-------|-------|------|
|                 | Shiga       | 19.67 | 16.19  | 22.96 | 1.41  | 1.14  | 1.63 | 0.21 | 0.02  | 0.38 | 0.71  | 0.30  | 1.10 |
|                 | Shimane     | 15.83 | 12.69  | 19.00 | 1.30  | 1.01  | 1.52 | 0.25 | 0.10  | 0.40 | 0.67  | 0.25  | 1.07 |
|                 | Shizuoka    | 15.98 | 13.00  | 18.71 | 1.26  | 1.04  | 1.47 | 0.14 | 0.01  | 0.25 | 0.87  | 0.33  | 1.40 |
|                 | Tokushima   | 14.85 | 11.46  | 17.91 | 1.27  | 1.03  | 1.49 | 0.17 | -0.01 | 0.32 | 0.62  | 0.17  | 1.08 |
|                 | Tochigi     | 18.94 | 15.86  | 21.82 | 1.28  | 1.04  | 1.48 | 0.34 | 0.18  | 0.48 | 0.95  | 0.41  | 1.43 |
|                 | Tokyo       | 14.18 | 11.88  | 16.15 | 0.90  | 0.71  | 1.07 | 0.29 | 0.17  | 0.40 | 0.67  | 0.34  | 1.02 |
|                 | Tottori     | 15.66 | 12.20  | 18.60 | 1.26  | 1.00  | 1.49 | 0.21 | 0.02  | 0.41 | 0.73  | 0.21  | 1.27 |
|                 | Toyama      | 14.92 | 11.90  | 17.73 | 1.13  | 0.85  | 1.37 | 0.23 | 0.08  | 0.37 | 0.65  | 0.25  | 1.03 |
|                 | Wakayama    | 15.54 | 12.42  | 18.31 | 1.32  | 1.06  | 1.52 | 0.14 | 0.01  | 0.29 | 0.71  | 0.32  | 1.12 |
|                 | Yamagata    | 16.22 | 12.72  | 19.72 | 1.00  | 0.66  | 1.29 | 0.36 | 0.19  | 0.50 | 0.76  | 0.23  | 1.29 |
|                 | Yamaguchi   | 16.59 | 13.55  | 19.41 | 1.32  | 1.12  | 1.49 | 0.21 | 0.04  | 0.37 | 0.86  | 0.40  | 1.35 |
|                 | Yamanashi   | 16.80 | 13.80  | 19.77 | 1.21  | 0.91  | 1.45 | 0.27 | 0.14  | 0.41 | 0.99  | 0.57  | 1.40 |
| Korea           | Busan       | 17.61 | 8.60   | 25.66 | 0.72  | 0.07  | 1.19 | 0.19 | -0.22 | 0.51 | 1.00  | -0.58 | 2.52 |
|                 | Daegu       | 15.44 | 7.56   | 22.10 | 0.73  | 0.07  | 1.22 | 0.19 | -0.11 | 0.47 | 1.18  | -0.61 | 3.03 |
|                 | Daejeon     | 15.84 | 8.02   | 22.32 | 0.81  | 0.29  | 1.23 | 0.18 | -0.05 | 0.39 | 1.09  | -0.87 | 2.82 |
|                 | Gwangju     | 16.30 | 8.16   | 23.69 | 0.66  | -0.01 | 1.13 | 0.24 | -0.05 | 0.48 | 1.17  | -0.75 | 3.00 |
|                 | Incheon     | 15.53 | 8.12   | 21.96 | 0.87  | 0.36  | 1.24 | 0.13 | -0.09 | 0.34 | 0.77  | -0.62 | 2.14 |
|                 | Seoul       | 14.44 | 7.06   | 21.00 | 0.85  | 0.35  | 1.21 | 0.19 | -0.09 | 0.41 | 0.72  | -1.06 | 2.41 |
|                 | Ulsan       | 17.85 | 9.53   | 25.28 | 0.73  | 0.11  | 1.23 | 0.28 | -0.16 | 0.64 | 1.19  | -0.60 | 3.05 |
| Chinese Taiwan  | Kaohsiung   | 10.34 | 2.47   | 17.00 | 1.32  | 0.82  | 1.69 | 0.34 | -0.10 | 0.72 | 1.17  | -0.64 | 3.24 |
|                 | Taipei      | 12.50 | 5.43   | 19.50 | 1.50  | 1.05  | 1.84 | 0.21 | -0.19 | 0.55 | 1.14  | -0.86 | 3.17 |
|                 | Taichung    | 11.22 | 3.29   | 17.88 | 1.33  | 0.73  | 1.76 | 0.29 | -0.06 | 0.62 | 1.41  | -1.19 | 3.87 |
| Vietnam         | Ho Chi Minh | 21.43 | 8.15   | 31.20 | 0.32  | -0.41 | 0.77 | 1.28 | 0.51  | 1.80 | 0.12  | -4.31 | 4.21 |
|                 | Hue         | 20.66 | -11.75 | 43.38 | 1.59  | -0.43 | 2.37 | 1.32 | 0.24  | 1.94 | -0.20 | -5.19 | 5.02 |
| The Philippines | Cebu        | 2.61  | -5.30  | 9.92  | 0.06  | -0.95 | 0.68 | 0.33 | -0.23 | 0.77 | 0.69  | -2.41 | 3.69 |
|                 | Davao       | 1.96  | -6.19  | 9.56  | -0.01 | -0.81 | 0.57 | 0.34 | -0.39 | 0.90 | 0.71  | -2.43 | 3.92 |
|                 | Manila      | 6.20  | -33.23 | 34.05 | -0.03 | -0.28 | 0.03 | 0.38 | -0.92 | 1.15 | 0.95  | -2.70 | 4.83 |
|                 | Quezon      | 1.94  | -4.26  | 7.50  | -0.02 | -1.75 | 0.84 | 0.25 | -0.32 | 0.68 | 0.99  | -3.77 | 4.93 |

**Supplementary Table S4.** Attributable (respiratory-related) mortality fractions (AF, %) by city, with 95% empirical confidence intervals.

| Attributable Fractions for Respiratory Mortality (%) |           |                          |       |       |                           |       |      |                          |      |      |                                        |       |      |
|------------------------------------------------------|-----------|--------------------------|-------|-------|---------------------------|-------|------|--------------------------|------|------|----------------------------------------|-------|------|
| Country /Region                                      | City      | Temperature AF (95% eCI) |       |       | Extreme Cold AF (95% eCI) |       |      | Extreme Hot AF (95% eCI) |      |      | Diurnal Temperature Range AF (95% eCI) |       |      |
| Japan                                                | Aichi     | 5.42                     | 1.75  | 8.87  | 0.83                      | 0.45  | 1.14 | 0.20                     | 0.10 | 0.31 | 0.44                                   | 0.05  | 0.79 |
|                                                      | Akita     | 13.21                    | 7.12  | 18.32 | 1.01                      | 0.41  | 1.44 | 0.33                     | 0.20 | 0.43 | 0.42                                   | -0.12 | 0.92 |
|                                                      | Aomori    | 12.26                    | 4.52  | 18.40 | 0.55                      | -0.28 | 1.08 | 0.45                     | 0.29 | 0.61 | 0.45                                   | -0.24 | 1.13 |
|                                                      | Chiba     | 8.71                     | 4.22  | 13.16 | 0.87                      | 0.43  | 1.18 | 0.17                     | 0.09 | 0.25 | 0.50                                   | 0.07  | 0.93 |
|                                                      | Ehime     | 6.55                     | 3.06  | 9.66  | 1.00                      | 0.62  | 1.33 | 0.21                     | 0.07 | 0.33 | 0.41                                   | 0.01  | 0.81 |
|                                                      | Fukushima | 11.93                    | 6.28  | 16.72 | 1.00                      | 0.42  | 1.43 | 0.35                     | 0.20 | 0.49 | 0.57                                   | 0.03  | 1.09 |
|                                                      | Fukui     | 8.42                     | 3.81  | 12.71 | 1.11                      | 0.59  | 1.53 | 0.29                     | 0.18 | 0.40 | 0.48                                   | 0.12  | 0.84 |
|                                                      | Fukuoka   | 6.47                     | 3.88  | 8.79  | 1.09                      | 0.80  | 1.36 | 0.26                     | 0.09 | 0.42 | 0.29                                   | -0.17 | 0.72 |
|                                                      | Gifu      | 7.91                     | 2.89  | 12.33 | 1.13                      | 0.67  | 1.49 | 0.20                     | 0.11 | 0.29 | 0.42                                   | 0.01  | 0.81 |
|                                                      | Gunma     | 7.85                     | 1.25  | 13.23 | 0.87                      | 0.45  | 1.24 | 0.22                     | 0.15 | 0.29 | 0.49                                   | 0.13  | 0.85 |
|                                                      | Hokkaido  | 10.62                    | 2.05  | 18.27 | 0.50                      | -0.05 | 0.95 | 0.33                     | 0.16 | 0.48 | 0.16                                   | -0.93 | 1.17 |
|                                                      | Hiroshima | 6.00                     | -0.83 | 12.27 | 0.82                      | 0.36  | 1.18 | 0.22                     | 0.05 | 0.38 | 0.17                                   | -0.61 | 0.90 |
|                                                      | Hyogo     | 6.65                     | 3.08  | 9.87  | 0.96                      | 0.61  | 1.27 | 0.23                     | 0.08 | 0.37 | 0.26                                   | -0.15 | 0.67 |
|                                                      | Ibaraki   | 10.89                    | 4.83  | 15.87 | 1.02                      | 0.51  | 1.39 | 0.31                     | 0.19 | 0.42 | 0.69                                   | -0.03 | 1.32 |
|                                                      | Ishikawa  | 7.22                     | 1.91  | 12.14 | 0.82                      | 0.29  | 1.22 | 0.21                     | 0.14 | 0.28 | 0.40                                   | 0.11  | 0.68 |
|                                                      | Iwate     | 14.02                    | 5.98  | 20.78 | 0.73                      | -0.13 | 1.30 | 0.46                     | 0.26 | 0.62 | 0.59                                   | -0.33 | 1.49 |
|                                                      | Kagawa    | 9.39                     | 4.44  | 13.58 | 1.15                      | 0.78  | 1.46 | 0.24                     | 0.10 | 0.37 | 0.39                                   | -0.03 | 0.77 |
|                                                      | Kanagawa  | 9.81                     | 3.75  | 15.07 | 0.75                      | 0.29  | 1.12 | 0.32                     | 0.14 | 0.49 | 0.61                                   | -0.08 | 1.28 |
|                                                      | Kagoshima | 9.16                     | 6.47  | 11.58 | 1.61                      | 1.29  | 1.87 | 0.30                     | 0.09 | 0.49 | 0.42                                   | -0.16 | 0.99 |
|                                                      | Kochi     | 6.89                     | 2.25  | 10.77 | 1.07                      | 0.51  | 1.48 | 0.13                     | 0.04 | 0.23 | 0.49                                   | 0.02  | 1.01 |
|                                                      | Kumamoto  | 8.08                     | 4.32  | 11.50 | 1.28                      | 0.86  | 1.61 | 0.22                     | 0.06 | 0.37 | 0.48                                   | -0.05 | 0.99 |
| Kyoto                                                | 7.48      | 3.07                     | 11.22 | 1.03  | 0.65                      | 1.33  | 0.20 | 0.09                     | 0.30 | 0.39 | -0.08                                  | 0.80  |      |
| Mie                                                  | 7.06      | 2.95                     | 10.91 | 1.06  | 0.58                      | 1.40  | 0.18 | 0.08                     | 0.29 | 0.34 | -0.01                                  | 0.68  |      |
| Miyagi                                               | 11.76     | 5.83                     | 17.10 | 0.96  | 0.39                      | 1.38  | 0.33 | 0.23                     | 0.44 | 0.54 | -0.07                                  | 1.08  |      |
| Miyazaki                                             | 8.06      | 4.90                     | 11.17 | 1.36  | 0.89                      | 1.68  | 0.20 | 0.05                     | 0.33 | 0.54 | -0.04                                  | 1.10  |      |
| Nagano                                               | 12.51     | 7.02                     | 17.64 | 1.15  | 0.64                      | 1.51  | 0.30 | 0.19                     | 0.39 | 0.53 | -0.14                                  | 1.14  |      |
| Nagasaki                                             | 8.18      | 4.88                     | 11.14 | 1.40  | 1.02                      | 1.68  | 0.20 | 0.07                     | 0.33 | 0.33 | -0.05                                  | 0.74  |      |
| Nara                                                 | 7.42      | 2.49                     | 11.97 | 0.71  | 0.20                      | 1.09  | 0.17 | 0.10                     | 0.24 | 0.57 | 0.17                                   | 0.97  |      |
| Niigata                                              | 10.26     | 4.25                     | 15.86 | 0.71  | 0.23                      | 1.14  | 0.23 | 0.15                     | 0.30 | 0.38 | 0.08                                   | 0.69  |      |
| Oita                                                 | 7.65      | 3.19                     | 11.83 | 1.04  | 0.66                      | 1.35  | 0.18 | 0.08                     | 0.27 | 0.44 | 0.02                                   | 0.85  |      |
| Okayama                                              | 9.21      | 2.53                     | 15.05 | 1.11  | 0.68                      | 1.45  | 0.22 | 0.08                     | 0.35 | 0.30 | -0.28                                  | 0.86  |      |



|                 |             |       |       |       |      |        |      |      |       |      |       |        |       |
|-----------------|-------------|-------|-------|-------|------|--------|------|------|-------|------|-------|--------|-------|
|                 | Okinawa     | 9.07  | 4.19  | 13.27 | 1.36 | 0.75   | 1.78 | 0.20 | -0.32 | 0.69 | 0.55  | -0.49  | 1.56  |
|                 | Osaka       | 6.50  | 2.96  | 9.66  | 0.91 | 0.56   | 1.19 | 0.18 | 0.06  | 0.30 | 0.35  | -0.03  | 0.73  |
|                 | Saga        | 7.10  | 2.33  | 11.03 | 1.12 | 0.68   | 1.48 | 0.18 | 0.05  | 0.30 | 0.38  | -0.15  | 0.87  |
|                 | Saitama     | 6.81  | 3.16  | 10.18 | 0.95 | 0.58   | 1.23 | 0.22 | 0.12  | 0.31 | 0.47  | 0.07   | 0.87  |
|                 | Shiga       | 10.01 | 4.52  | 14.48 | 0.87 | 0.31   | 1.33 | 0.27 | 0.14  | 0.39 | 0.50  | 0.07   | 0.92  |
|                 | Shimane     | 9.19  | 2.55  | 15.10 | 1.16 | 0.67   | 1.50 | 0.21 | 0.12  | 0.29 | 0.31  | -0.09  | 0.75  |
|                 | Shizuoka    | 7.40  | 4.10  | 10.50 | 1.10 | 0.71   | 1.40 | 0.15 | 0.04  | 0.26 | 0.60  | 0.04   | 1.24  |
|                 | Tokushima   | 7.15  | 3.18  | 10.86 | 1.07 | 0.62   | 1.41 | 0.20 | 0.06  | 0.33 | 0.27  | -0.17  | 0.75  |
|                 | Tochigi     | 9.70  | 4.94  | 14.41 | 1.14 | 0.73   | 1.47 | 0.31 | 0.21  | 0.40 | 0.65  | 0.12   | 1.19  |
|                 | Tokyo       | 4.84  | 0.69  | 8.92  | 0.29 | -0.12  | 0.66 | 0.12 | 0.04  | 0.18 | 0.44  | 0.05   | 0.82  |
|                 | Tottori     | 8.97  | 2.14  | 15.02 | 0.98 | 0.51   | 1.38 | 0.22 | 0.11  | 0.32 | 0.31  | -0.22  | 0.82  |
|                 | Toyama      | 9.86  | 2.83  | 15.93 | 0.85 | 0.25   | 1.25 | 0.20 | 0.13  | 0.27 | 0.31  | -0.13  | 0.71  |
|                 | Wakayama    | 7.97  | 3.80  | 12.20 | 1.06 | 0.60   | 1.40 | 0.16 | 0.07  | 0.26 | 0.40  | 0.03   | 0.77  |
|                 | Yamagata    | 12.25 | 5.46  | 17.96 | 0.81 | 0.14   | 1.31 | 0.28 | 0.18  | 0.38 | 0.46  | -0.18  | 1.13  |
|                 | Yamaguchi   | 8.49  | 3.09  | 13.60 | 1.00 | 0.61   | 1.34 | 0.21 | 0.13  | 0.30 | 0.43  | -0.04  | 0.87  |
|                 | Yamanashi   | 8.28  | 3.47  | 12.33 | 1.19 | 0.75   | 1.57 | 0.20 | 0.12  | 0.27 | 0.59  | 0.14   | 0.99  |
| Korea           | Busan       | 13.11 | -4.44 | 26.24 | 0.12 | -1.86  | 1.21 | 0.56 | 0.06  | 0.95 | 0.53  | -0.72  | 1.73  |
|                 | Daegu       | 13.75 | -2.67 | 25.44 | 0.30 | -1.36  | 1.28 | 0.47 | 0.04  | 0.80 | 0.38  | -0.93  | 1.92  |
|                 | Daejeon     | 15.70 | -0.89 | 28.31 | 0.33 | -1.09  | 1.19 | 0.45 | 0.10  | 0.75 | 0.21  | -1.39  | 1.73  |
|                 | Gwangju     | 14.49 | -1.16 | 27.47 | 0.22 | -1.55  | 1.18 | 0.48 | 0.08  | 0.79 | 0.48  | -1.04  | 1.92  |
|                 | Incheon     | 15.78 | 0.44  | 28.38 | 0.43 | -0.99  | 1.24 | 0.47 | 0.12  | 0.76 | 0.07  | -1.07  | 1.27  |
|                 | Seoul       | 15.86 | -0.16 | 28.65 | 0.59 | -0.75  | 1.36 | 0.49 | 0.11  | 0.80 | -0.14 | -1.84  | 1.34  |
|                 | Ulsan       | 13.41 | -5.22 | 27.52 | 0.05 | -2.13  | 1.21 | 0.58 | 0.08  | 1.01 | 0.60  | -0.97  | 2.15  |
| Chinese Taiwan  | Kaohsiung   | 8.38  | -2.59 | 16.81 | 1.32 | 0.46   | 1.83 | 0.93 | 0.48  | 1.29 | 0.07  | -2.47  | 2.71  |
|                 | Taipei      | 11.06 | -2.69 | 21.73 | 1.35 | 0.31   | 1.90 | 0.83 | 0.47  | 1.11 | -0.03 | -2.70  | 2.54  |
|                 | Taichung    | 10.04 | -2.89 | 20.66 | 1.56 | 0.68   | 2.05 | 0.80 | 0.39  | 1.11 | 0.01  | -3.57  | 3.33  |
| Vietnam         | Ho Chi Minh | 29.06 | -     | 56.00 | -    | -      | 1.36 | 0.06 | -0.26 | 0.12 | 1.63  | -13.03 | 13.90 |
|                 | Hue         | 53.18 | -     | 88.42 | 0.08 | -14.00 | 0.05 | 1.04 | -     | 2.69 | 1.43  | -17.33 | 17.09 |
| The Philippines | Cebu        | 14.98 | -4.96 | 30.65 | 0.65 | -0.17  | 1.11 | 1.07 | 0.36  | 1.56 | 0.99  | -3.29  | 4.62  |
|                 | Davao       | 12.99 | -4.94 | 27.87 | 0.41 | -0.46  | 0.89 | 1.30 | 0.44  | 1.83 | 1.06  | -2.69  | 4.77  |
|                 | Manila      | 13.44 | -4.74 | 28.03 | 0.75 | -0.84  | 1.47 | 1.14 | 0.37  | 1.60 | 1.44  | -3.57  | 5.99  |
|                 | Quezon      | 17.22 | -3.81 | 33.41 | 0.78 | -1.00  | 1.49 | 1.11 | 0.43  | 1.61 | 1.47  | -4.41  | 6.95  |

**Supplementary Table S5.** Minimum mortality percentile and temperature by causes of death for each city.

| Country<br>/Region | City      | Minimum Mortality Percentile (MMP) and Temperature (MMT) |          |                        |          |                     |          |
|--------------------|-----------|----------------------------------------------------------|----------|------------------------|----------|---------------------|----------|
|                    |           | Non-accidental                                           |          | Cardiovascular-related |          | Respiratory-related |          |
|                    |           | MMP (%)                                                  | MMT (°C) | MMP (%)                | MMT (°C) | MMP (%)             | MMT (°C) |
| Japan              | Aichi     | 83                                                       | 25.2     | 86                     | 26.1     | 63                  | 19.8     |
|                    | Akita     | 92                                                       | 24.3     | 92                     | 24.3     | 91                  | 23.9     |
|                    | Aomori    | 92                                                       | 22.8     | 93                     | 23.2     | 92                  | 22.8     |
|                    | Chiba     | 92                                                       | 27       | 91                     | 26.7     | 91                  | 26.7     |
|                    | Ehime     | 91                                                       | 27.6     | 90                     | 27.3     | 60                  | 19.3     |
|                    | Fukushima | 91                                                       | 25.3     | 92                     | 25.7     | 91                  | 25.3     |
|                    | Fukui     | 91                                                       | 26.8     | 92                     | 27.1     | 91                  | 26.8     |
|                    | Fukuoka   | 82                                                       | 25.3     | 82                     | 25.3     | 54                  | 18.3     |
|                    | Gifu      | 84                                                       | 25.5     | 88                     | 26.7     | 70                  | 21.8     |
|                    | Gunma     | 90                                                       | 26.1     | 91                     | 26.4     | 83                  | 23.9     |
|                    | Hokkaido  | 92                                                       | 21.9     | 92                     | 21.9     | 84                  | 19.6     |
|                    | Hiroshima | 81                                                       | 24.6     | 83                     | 25.3     | 74                  | 22.7     |
|                    | Hyogo     | 74                                                       | 22.9     | 90                     | 27.4     | 63                  | 20.3     |
|                    | Ibaraki   | 93                                                       | 25.8     | 93                     | 25.8     | 92                  | 25.5     |
|                    | Ishikawa  | 90                                                       | 26.3     | 91                     | 26.7     | 89                  | 25.9     |
|                    | Iwate     | 92                                                       | 23.4     | 92                     | 23.4     | 92                  | 23.4     |
|                    | Kagawa    | 84                                                       | 25.8     | 90                     | 27.4     | 67                  | 21.2     |
|                    | Kanagawa  | 91                                                       | 26.7     | 91                     | 26.7     | 91                  | 26.7     |
|                    | Kagoshima | 73                                                       | 24.2     | 82                     | 26.8     | 54                  | 19.9     |
|                    | Kochi     | 72                                                       | 22.8     | 91                     | 27.3     | 66                  | 21.4     |
|                    | Kumamoto  | 71                                                       | 22.9     | 90                     | 27.7     | 63                  | 21       |
|                    | Kyoto     | 86                                                       | 26.4     | 90                     | 27.6     | 66                  | 20.8     |
|                    | Mie       | 82                                                       | 24.8     | 90                     | 26.8     | 65                  | 20.2     |
|                    | Miyagi    | 94                                                       | 24.9     | 94                     | 24.9     | 92                  | 24.2     |
|                    | Miyazaki  | 74                                                       | 23.5     | 91                     | 27.5     | 58                  | 19.9     |
|                    | Nagano    | 92                                                       | 25.2     | 92                     | 25.2     | 91                  | 24.9     |
|                    | Nagasaki  | 82                                                       | 25.5     | 86                     | 26.6     | 60                  | 20       |
|                    | Nara      | 92                                                       | 26.9     | 92                     | 26.9     | 91                  | 26.6     |
|                    | Niigata   | 90                                                       | 25.4     | 91                     | 25.8     | 86                  | 24.1     |
|                    | Oita      | 92                                                       | 27.4     | 91                     | 27.1     | 68                  | 21.1     |
|                    | Okayama   | 91                                                       | 27.9     | 90                     | 27.6     | 75                  | 23.2     |
|                    | Okinawa   | 99                                                       | 30       | 85                     | 28.3     | 50                  | 23.3     |
|                    | Osaka     | 80                                                       | 25.3     | 83                     | 26.2     | 64                  | 21       |
|                    | Saga      | 81                                                       | 25.2     | 91                     | 27.7     | 65                  | 21       |
|                    | Saitama   | 88                                                       | 25.8     | 91                     | 26.7     | 64                  | 19.1     |

|                 |             |    |      |    |      |    |       |
|-----------------|-------------|----|------|----|------|----|-------|
|                 | Shiga       | 91 | 26.8 | 92 | 27   | 91 | 26.8  |
|                 | Shimane     | 90 | 26   | 90 | 26   | 77 | 22.2  |
|                 | Shizuoka    | 92 | 27   | 93 | 27.2 | 61 | 19.6  |
|                 | Tokushima   | 82 | 25.2 | 86 | 26.2 | 62 | 20.1  |
|                 | Tochigi     | 92 | 25.9 | 92 | 25.9 | 92 | 25.9  |
|                 | Tokyo       | 88 | 26.6 | 87 | 26.2 | 91 | 27.4  |
|                 | Tottori     | 90 | 26.4 | 91 | 26.7 | 78 | 22.6  |
|                 | Toyama      | 86 | 24.4 | 91 | 26.1 | 81 | 22.9  |
|                 | Wakayama    | 79 | 24.7 | 90 | 27.6 | 66 | 21.2  |
|                 | Yamagata    | 91 | 24.6 | 92 | 24.9 | 87 | 23.2  |
|                 | Yamaguchi   | 86 | 25.6 | 91 | 26.9 | 75 | 22.55 |
|                 | Yamanashi   | 91 | 26.4 | 91 | 26.4 | 66 | 19.7  |
| Korea           | Busan       | 94 | 26.6 | 93 | 26.2 | 84 | 23.3  |
|                 | Daegu       | 91 | 26.9 | 91 | 26.9 | 81 | 23.8  |
|                 | Daejeon     | 91 | 25.5 | 92 | 25.8 | 80 | 23.0  |
|                 | Gwangju     | 92 | 26.5 | 92 | 26.5 | 81 | 23.7  |
|                 | Incheon     | 93 | 25.4 | 93 | 25.4 | 80 | 22.3  |
|                 | Seoul       | 84 | 24.0 | 85 | 24.2 | 79 | 22.8  |
|                 | Ulsan       | 93 | 26.5 | 92 | 26.2 | 83 | 23.4  |
| Chinese Taiwan  | Kaohsiung   | 45 | 25.7 | 76 | 28.4 | 69 | 27.9  |
|                 | Taipei      | 57 | 25.0 | 76 | 27.8 | 76 | 27.8  |
|                 | Taichung    | 51 | 25.0 | 77 | 27.8 | 75 | 27.6  |
| Vietnam         | Ho Chi Minh | 83 | 29.8 | 82 | 29.7 | 99 | 31.6  |
|                 | Hue         | 79 | 29.3 | 8  | 18.7 | 1  | 15.8  |
| The Philippines | Cebu        | 79 | 29.7 | 76 | 29.6 | 6  | 26.3  |
|                 | Davao       | 80 | 29.0 | 77 | 28.9 | 5  | 25.8  |
|                 | Manila      | 79 | 29.2 | 1  | 24.9 | 6  | 26.5  |
|                 | Quezon      | 79 | 28.6 | 72 | 28.2 | 6  | 25.0  |

**Supplementary Table S6.** Random-effect meta-regression model at second stage with multivariate Cochran Q test for heterogeneity (p-value), and I<sup>2</sup> statistics (%) in various models (for first step).

| Deaths                 | Relationship          | Model            | Predictor           | Q test  | I <sup>2</sup> |
|------------------------|-----------------------|------------------|---------------------|---------|----------------|
| Non-accidental         | Temperature-mortality | Intercept-only   | -                   | <0.0001 | 57.3%          |
|                        |                       | Single predictor | Average temperature | <0.0001 | 52.3%          |
|                        |                       |                  | Temperature range   | <0.0001 | 55.2%          |
|                        |                       | Full model       | Country             | <0.0001 | 53.0%          |
|                        |                       |                  | Average temperature | <0.0001 | 40.8%          |
|                        |                       | Country          |                     |         |                |
|                        | DTR-mortality         | Intercept-only   | -                   | 1.0000  | 1.0%           |
|                        |                       | Single predictor | Average temperature | 1.0000  | 1.0%           |
|                        |                       |                  | Temperature range   | 1.0000  | 1.0%           |
|                        |                       | Full model       | Country             | 1.0000  | 1.0%           |
|                        |                       |                  | Average temperature | 1.0000  | 1.0%           |
|                        |                       | Country          | 1.0000              | 1.0%    |                |
| Cardiovascular-related | Temperature-mortality | Intercept-only   | -                   | <0.0001 | 42.5%          |
|                        |                       | Single predictor | Average temperature | <0.0001 | 37.0%          |
|                        |                       |                  | Temperature range   | <0.0001 | 40.7%          |
|                        |                       | Full model       | Country             | <0.0001 | 38.9%          |
|                        |                       |                  | Average temperature | <0.0001 | 26.8%          |
|                        |                       | Country          |                     |         |                |
|                        | DTR-mortality         | Intercept-only   | -                   | 1.0000  | 1.0%           |
|                        |                       | Single predictor | Average temperature | 1.0000  | 1.0%           |
|                        |                       |                  | Temperature range   | 1.0000  | 1.0%           |
|                        |                       | Full model       | Country             | 1.0000  | 1.0%           |
|                        |                       |                  | Average temperature | 1.0000  | 1.0%           |
|                        |                       | Country          | 1.0000              | 1.0%    |                |
| Respiratory-related    | Temperature-mortality | Intercept-only   | -                   | <0.0001 | 28.2%          |
|                        |                       | Single predictor | Average temperature | 0.0005  | 22.5%          |
|                        |                       |                  | Temperature range   | <0.0001 | 26.1%          |
|                        |                       | Full model       | Country             | 0.0002  | 24.4%          |
|                        |                       |                  | Average temperature | 0.0425  | 13.1%          |
|                        |                       | Country          |                     |         |                |
|                        | DTR-mortality         | Intercept-only   | -                   | 1.0000  | 1.0%           |
|                        |                       | Single predictor | Average temperature | 1.0000  | 1.0%           |
|                        |                       |                  | Temperature range   | 1.0000  | 1.0%           |
|                        |                       | Full model       | Country             | 1.0000  | 1.0%           |
|                        |                       |                  | Average temperature | 1.0000  | 1.0%           |
|                        |                       | Country          | 1.0000              | 1.0%    |                |

1 **Supplementary Table S7.** Study periods and data sources for each city

| <b>Country /Region</b> | <b>City</b>    | <b>Study period</b> | <b>Mortality</b>                                             | <b>Weather variable</b>                                                           |
|------------------------|----------------|---------------------|--------------------------------------------------------------|-----------------------------------------------------------------------------------|
| <b>Japan</b>           | 47 prefectures | 1972–2012           | Ministry of Health & Welfare of Japan                        | Japan Meteorological Agency                                                       |
| <b>South Korea</b>     | 7 cities       | 1992–2010           | Korea National Statistics Office                             | Korea Meteorological Office                                                       |
| <b>Chinese Taiwan</b>  | 3 cities       | 1994–2007           | National Death Registry of Taiwan                            | Taiwan Environmental Protection Administration                                    |
| <b>Vietnam</b>         | 2 cities       | 2009-2013           | Provincial Health Departments                                | US National Oceanic and Atmospheric Administration's National Climate Data Center |
| <b>The Philippines</b> | 4 cities       | 2006-2010           | Philippine Statistics Authority - National Statistics Office | US National Oceanic and Atmospheric Administration's National Climate Data Center |

## Supplementary Figure Legends

**Supplementary Figure S1. Total (non-accidental) mortality. Cumulative exposure-response relations in 63 east-Asia locations:** Exposure-response associations with related temperature. Thick dashed lines are the 2.5<sup>th</sup> and 97.5<sup>th</sup> percentiles as cut offs. Light dashed lines are minimum mortality temperatures. Using city-specific distributed lag non-linear model.

**Supplementary Figure S2. Lag-response associations based on 99% diurnal temperature range(°C) in 63 east-Asia locations for total (non-accidental) mortality:** Lag-response associations from predicted values of multivariate meta-regression (with 95% confidence intervals, vertical bar) in three countries. RR, relative risk.

**Non-accidental**

Aichi , Japan

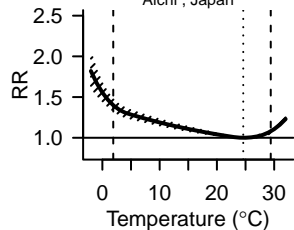**Non-accidental**

Akita , Japan

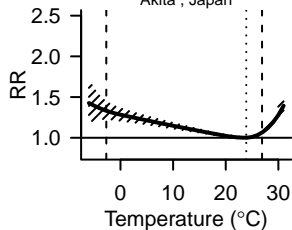**Non-accidental**

Aomori , Japan

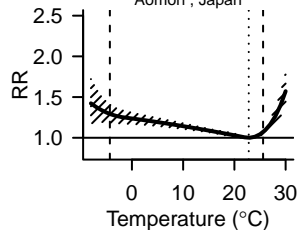**Non-accidental**

Chiba , Japan

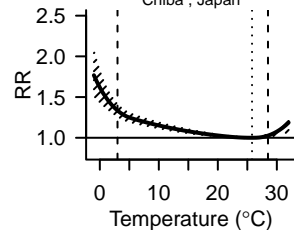**Non-accidental**

Ehime , Japan

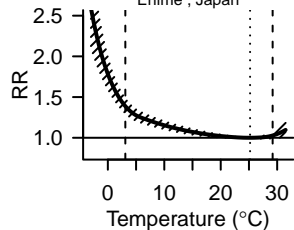**Non-accidental**

Fukushima , Japan

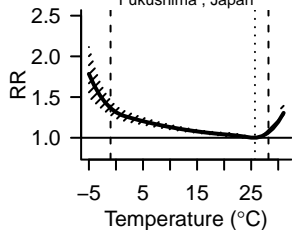**Non-accidental**

Fukui , Japan

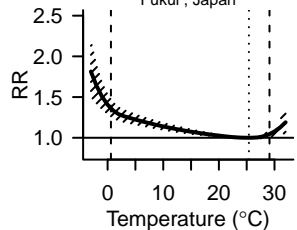**Non-accidental**

Fukuoka , Japan

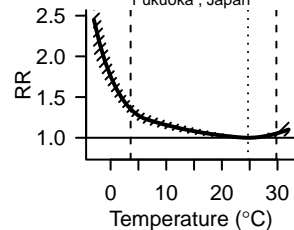**Non-accidental**

Gifu , Japan

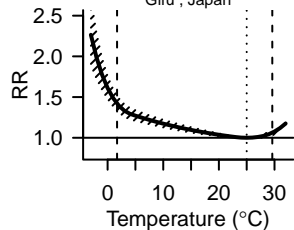**Non-accidental**

Gunma , Japan

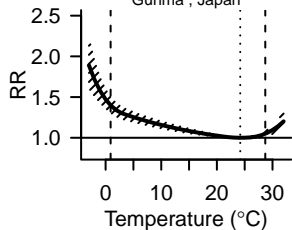**Non-accidental**

Hokkaido , Japan

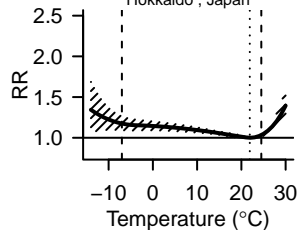**Non-accidental**

Hiroshima , Japan

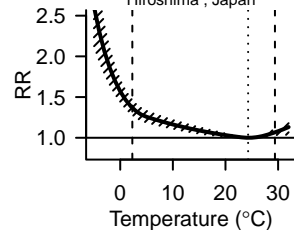**Non-accidental**

Hyogo , Japan

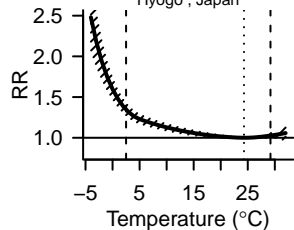**Non-accidental**

Ibaraki , Japan

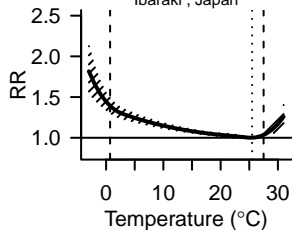**Non-accidental**

Ishikawa , Japan

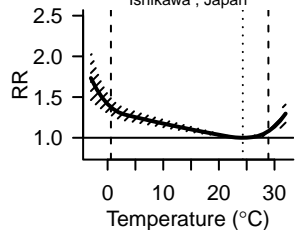**Non-accidental**

Iwate , Japan

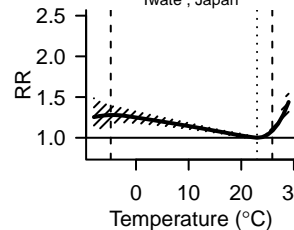

**Non-accidental**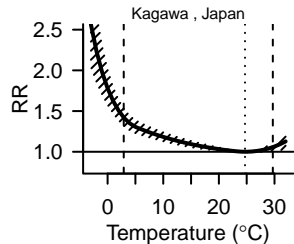**Non-accidental**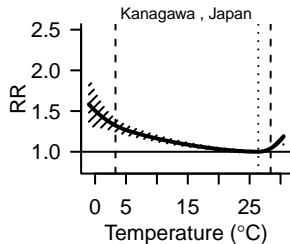**Non-accidental**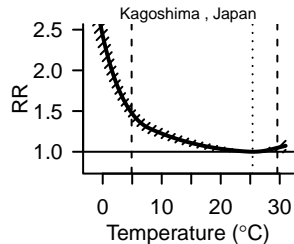**Non-accidental**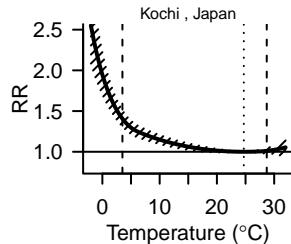**Non-accidental**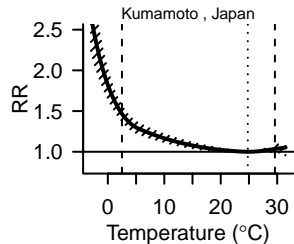**Non-accidental**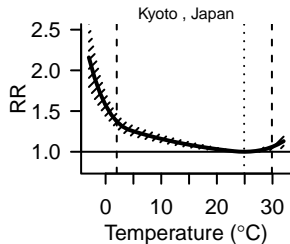**Non-accidental**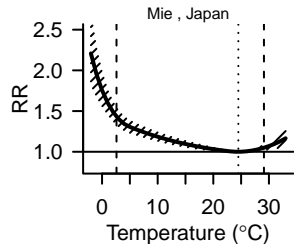**Non-accidental**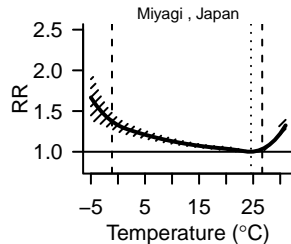**Non-accidental**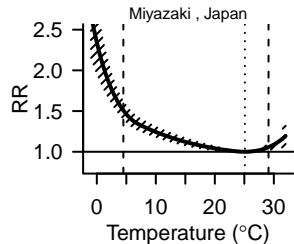**Non-accidental**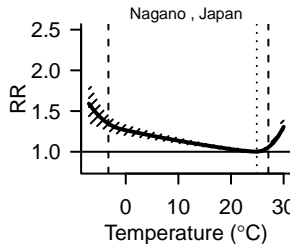**Non-accidental**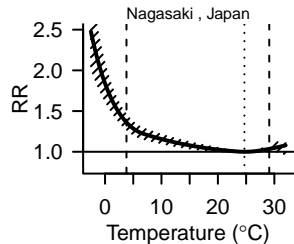**Non-accidental**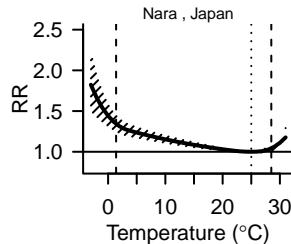**Non-accidental**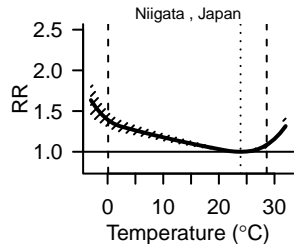**Non-accidental**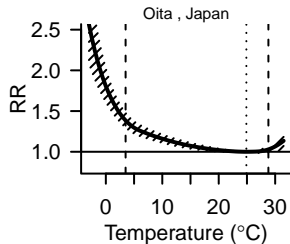**Non-accidental**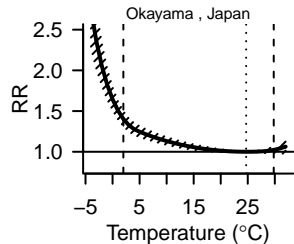**Non-accidental**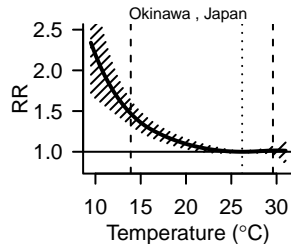



**Non-accidental**

Osaka , Japan

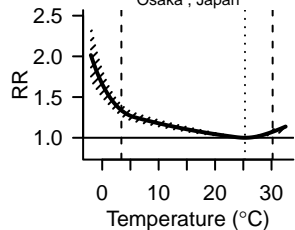**Non-accidental**

Saga , Japan

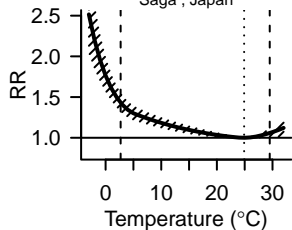**Non-accidental**

Saitama , Japan

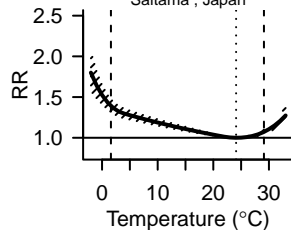**Non-accidental**

Shiga , Japan

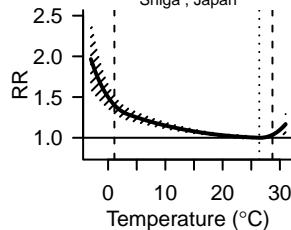**Non-accidental**

Shimane , Japan

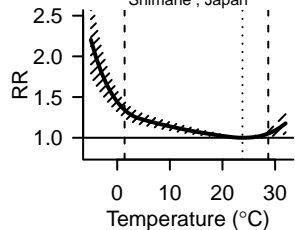**Non-accidental**

Shizuoka , Japan

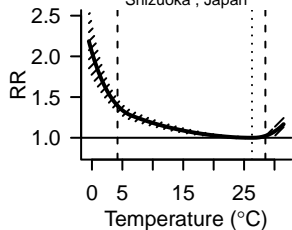**Non-accidental**

Tokushima , Japan

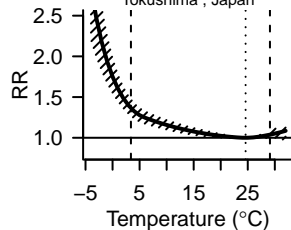**Non-accidental**

Tochigi , Japan

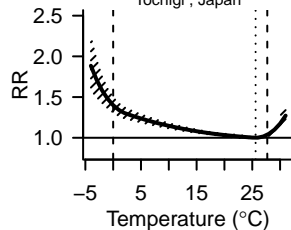**Non-accidental**

Tokyo , Japan

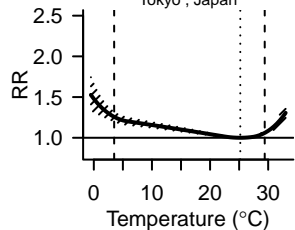**Non-accidental**

Tottori , Japan

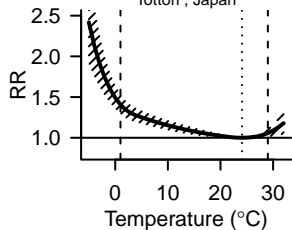**Non-accidental**

Toyama , Japan

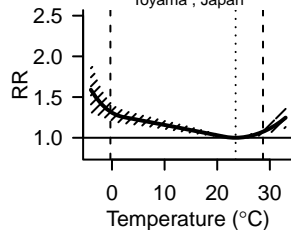**Non-accidental**

Wakayama , Japan

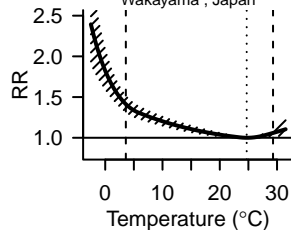**Non-accidental**

Yamagata , Japan

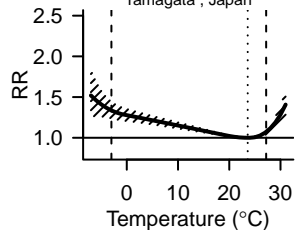**Non-accidental**

Yamaguchi , Japan

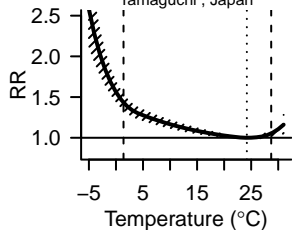**Non-accidental**

Yamanashi , Japan

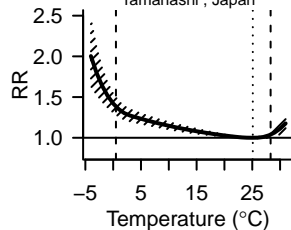**Non-accidental**

Busan , South Korea

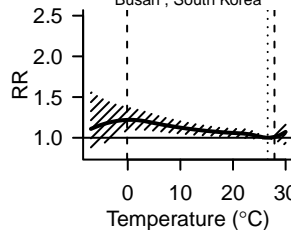

Supplement: 41598_2017_10433_MOESM1_ESM.pdf [file 41598_2017_10433_MOESM1_ESM.pdf]
